# Supplementary material
Source: publisher figshare collection journal article supplement (https://karger.figshare.com/ndownloader/files/24989573)
Supplement: Supplementary file 1 [file 24989573]

**Table S4. Cox proportional hazards analysis for cardiovascular endpoint**

| Variable | Univariable | |  | Multivariable | |
| --- | --- | --- | --- | --- | --- |
| HR (95% CI) | P value |  | HR (95% CI) | P value |
| Age (years) | 1.00 (0.97-1.03) | >0.99 |  |  |  |
| Men | 0.61 (0.29-1.30) | 0.20 |  |  |  |
| Body mass index (kg/m2) | 1.00 (0.91-1.11) | 0.97 |  |  |  |
| Hypertension | 2.13 (0.75-6.04) | 0.16 |  |  |  |
| Dyslipidemia | 0.85 (0.41-1.77) | 0.66 |  |  |  |
| Diabetes mellitus | 0.97 (0.50-1.90) | 0.93 |  |  |  |
| Current smoker | 0.51 (0.18-1.43) | 0.20 |  |  |  |
| Baseline eGFR (mL/min/1.73 m2) | 0.99 (0.97-1.00) | 0.13 |  |  |  |
| Calcium channel blocker | 1.08 (0.56-2.10) | 0.82 |  |  |  |
| Diuretics | 1.28 (0.60-2.72) | 0.53 |  |  |  |
| ACE-I or ARB | 1.80 (0.82-3.95) | 0.15 |  |  |  |
| Mean systolic BP (mm Hg) | 1.00 (0.97-1.03) | 0.96 |  | 0.99 (0.96-1.01) | 0.33 |
| CV of systolic BP | 1.15 (1.05-1.25) | 0.003 |  | 1.14 (1.04-1.24) | 0.008 |
| In-stent restenosis | 2.67 (1.11-6.44) | 0.03 |  | 1.91 (0.70-4.44) | 0.19 |
| Chronic total occlusion | 2.18 (0.84-5.64) | 0.11 |  |  |  |
| Drug eluting stent use | 0.40 (0.12-1.32) | 0.14 |  |  |  |
| Total stent length (mm) | 1.00 (0.98-1.01) | 0.43 |  |  |  |

Mean systolic BP was included into multivariable model irrespective of a p value on univariable analysis.

ACE-I, angiotensin converting enzyme inhibitor; ARB, angiotensin receptor blocker; BP, blood pressure; CI, confidence intervals; CV, coefficient of variation; eGFR, [estimated glomerular filtration rate](javascript:void(0);); HR, hazard ratio.
